# Supplementary material
Source: PubMed Central journal article supplement (PMC8338785)
Supplement: NIHMS1686861-supplement-7.pdf [file NIHMS1686861-supplement-7.pdf]

# Supplementary Figure S6

**a**

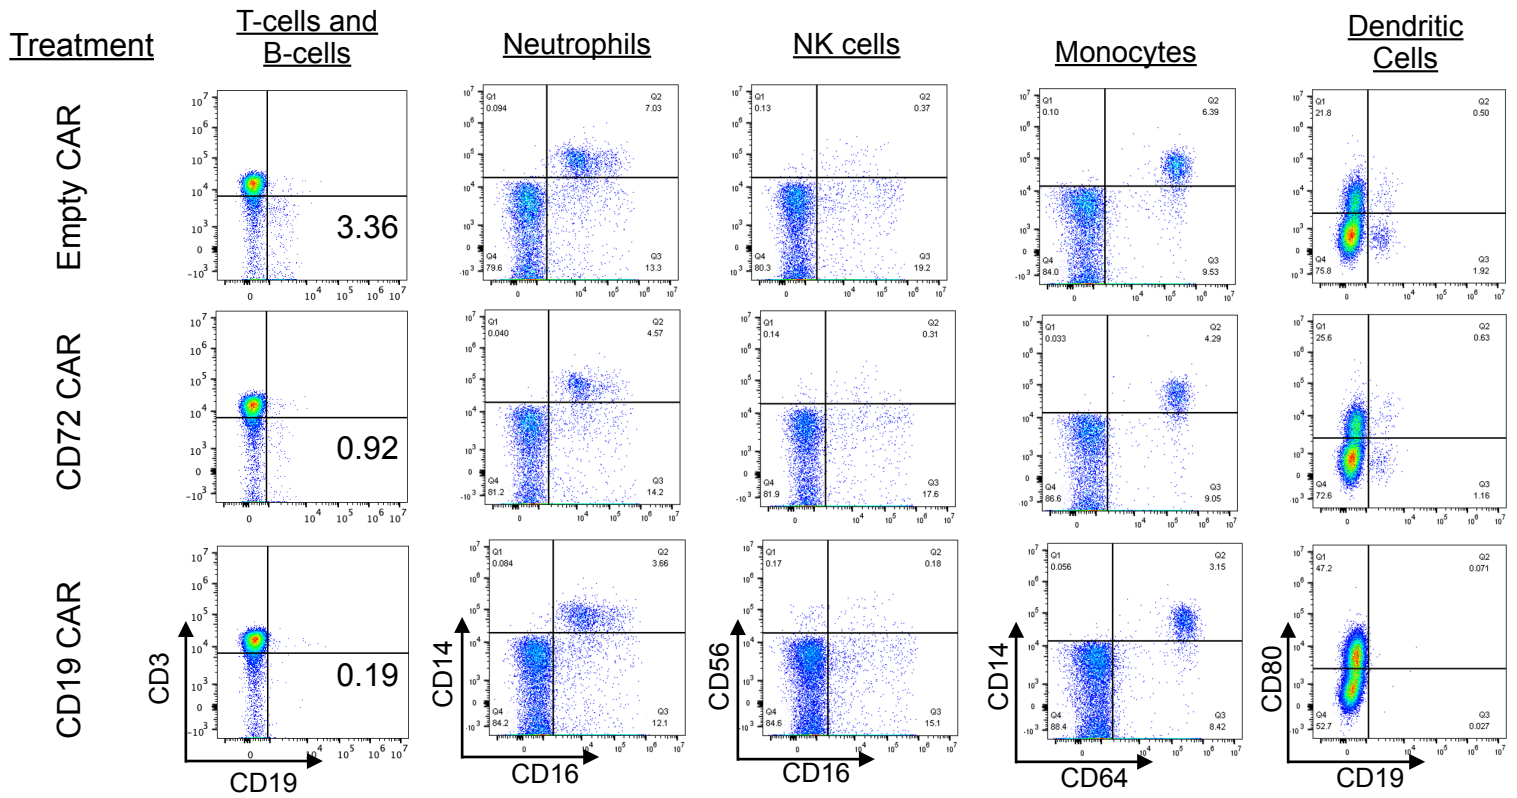

**b**

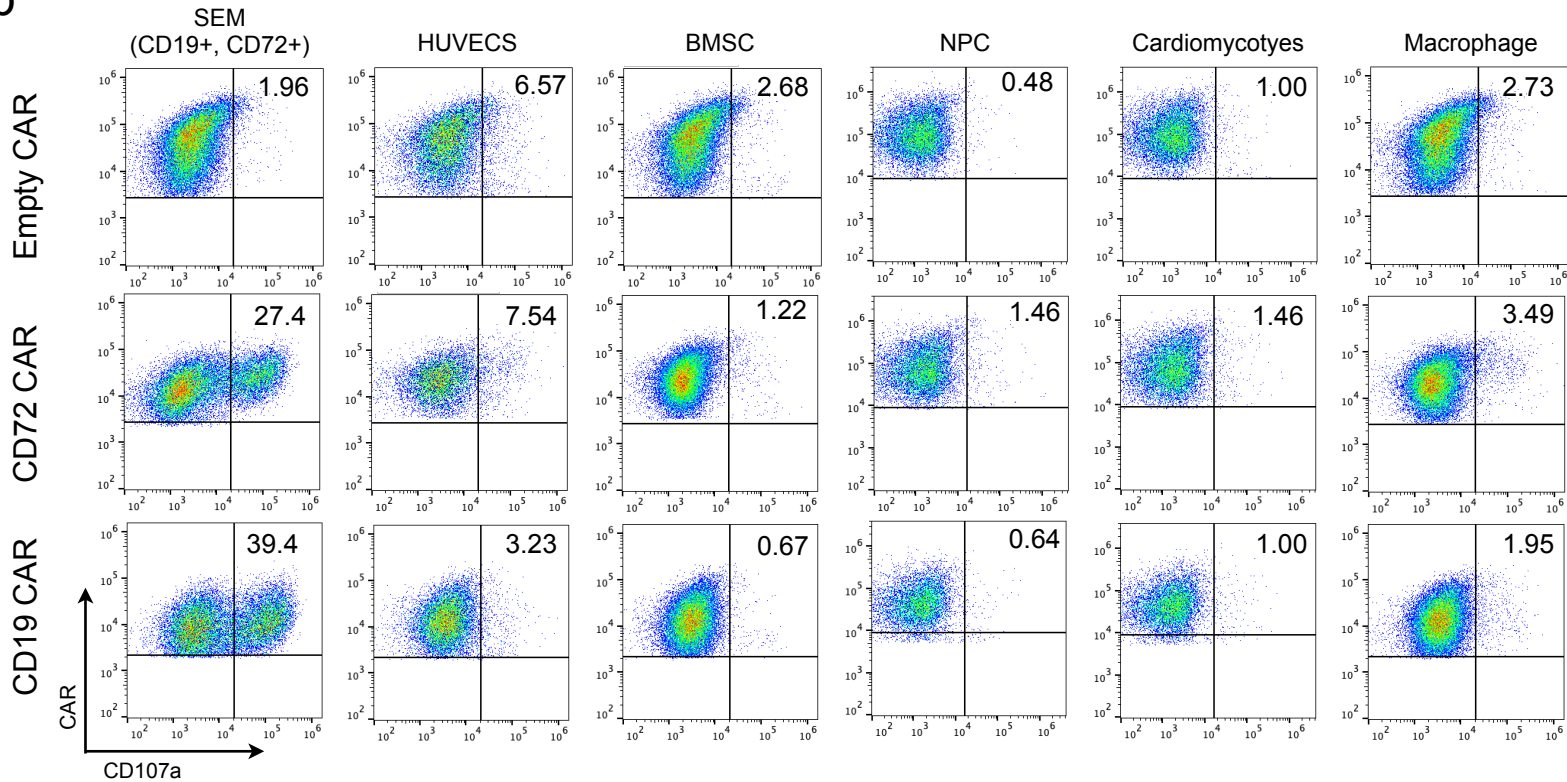

## Supplementary Figure S6: CD72 CAR T does not induce normal tissue cytotoxicity *in vitro*

(a) FACS analysis of normal donor PBMC's after 24hr co-culture with either CD72, CD19, or Empty CAR-T's. Flow plots display lack of cell ablation for T-cells, neutrophils, NK cells, monocytes, and dendritic cells. B-cells were fully eradicated by CD19 CAR-T while partly eradicated by CD72 CAR-T. (b) *In vitro* FACS-based degranulation assay where target cells (both tumor and normal tissues) were cocultured with either CD19, CD72, or Empty CAR-T's at a 2:1 E:T ratio along with CD107a antibody and Golgistop for 6-hours prior to analysis by FACS. The SEM B-ALL cell line (CD19+, CD72+) was included as a positive control. HUVECS = human umbilical vein endothelial cells, BMSC = bone marrow stromal cells, NPC = neuronal progenitor cells. Percentage of CAR degranulation is displayed in the upper right-hand quadrant. Data consists of two separate experiments with CAR-T's generated from different donor T cells.
