# Supplementary material
Source: PubMed Central journal article supplement (PMC8338785)
Supplement: NIHMS1686861-supplement-8.pdf [file NIHMS1686861-supplement-8.pdf]

# Supplementary Figure S7

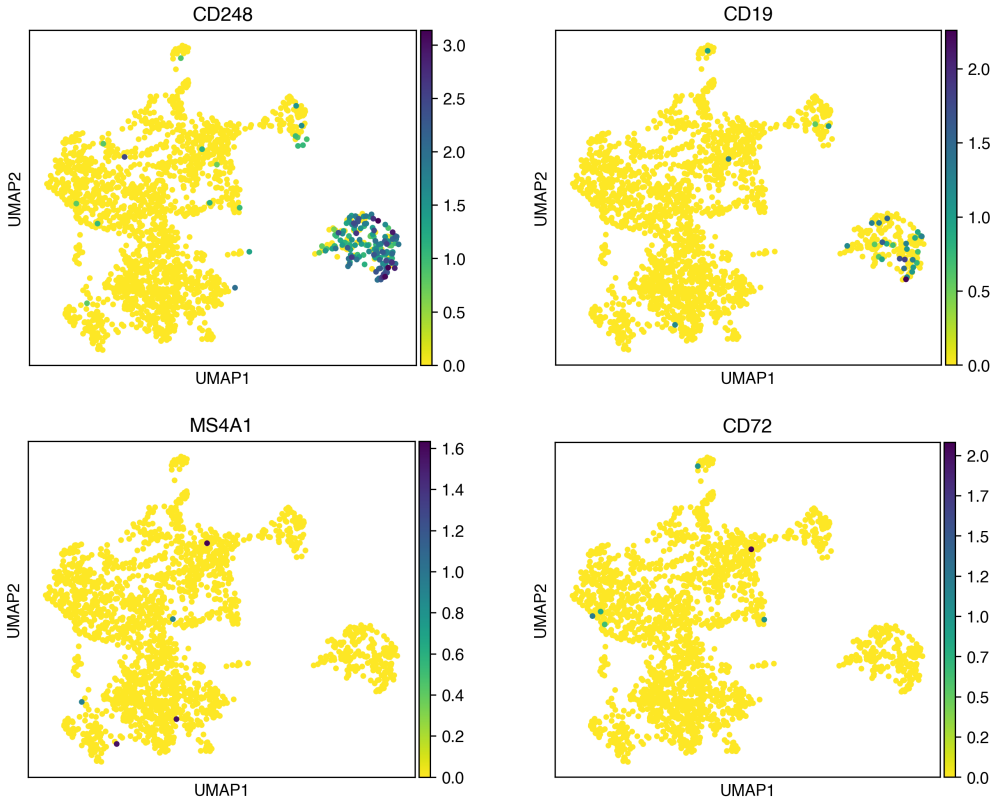

**Supplementary Figure S7: Single-cell RNAseq analysis demonstrates no CD72 expression in human brain tissues**  
Uniform manifold approximation and projection (UMAP) plots displaying single-cell RNA-seq data from human prenatal brain (La Manno et al, 2016), colored by gene expression, showing CD248, CD19, MS4A1 (CD20), and CD72. Plot scale displays gene expression values in log counts-per-ten-thousand.
